# Supplementary material for: Association Between the Gut Microbiota and Blood Pressure in a Population Cohort of 6953 Individuals
Source: PubMed Central journal article supplement — J Am Heart Assoc. 2020 Jul 21;9(15):e016641. doi: 10.1161/JAHA.120.016641 (PMC7792269; doi:10.1161/jaha.120.016641), 2020-07-21
Supplement: JAH3-9-e016641-s001.pdf [file JAH3-9-e016641-s001.pdf]

# **SUPPLEMENTAL MATERIAL**

**Table S1. *Lactobacillus* species (N=134).**

| Ace–Dex                  | Dio–Kim                     | Kim–Pla                    | Pob–Xia                     |
|--------------------------|-----------------------------|----------------------------|-----------------------------|
| <i>L. acetotolerans</i>  | <i>L. diolivorans</i>       | <i>L. kimchiensis</i>      | <i>L. pobuzihii</i>         |
| <i>L. acidifarinae</i>   | <i>L. equi</i>              | <i>L. koreensis</i>        | <i>L. pontis</i>            |
| <i>L. acidipiscis</i>    | <i>L. equicursoris</i>      | <i>L. kullabergensis</i>   | <i>L. psittaci</i>          |
| <i>L. acidophilus</i>    | <i>L. equigenerosi</i>      | <i>L. kunkeei</i>          | <i>L. rapi</i>              |
| <i>L. agilis</i>         | <i>L. fabifermentans</i>    | <i>L. lindneri</i>         | <i>L. rennini</i>           |
| <i>L. algidus</i>        | <i>L. farciminis</i>        | <i>L. lindneri*</i>        | <i>L. reuteri</i>           |
| <i>L. alimentarius</i>   | <i>L. farraginis</i>        | <i>L. malefermentans</i>   | <i>L. rhamnosus</i>         |
| <i>L. amylolyticus</i>   | <i>L. fermentum</i>         | <i>L. manihotivorans</i>   | <i>L. rossiae</i>           |
| <i>L. amylotrophicus</i> | <i>L. floricola</i>         | <i>L. mellifer</i>         | <i>L. ruminis</i>           |
| <i>L. amylovorus</i>     | <i>L. florum</i>            | <i>L. mellifer*</i>        | <i>L. saerimneri</i>        |
| <i>L. amylovorus*</i>    | <i>L. fructivorans</i>      | <i>L. mellis</i>           | <i>L. sakei</i>             |
| <i>L. animalis</i>       | <i>L. frumenti</i>          | <i>L. mindensis</i>        | <i>L. salivarius</i>        |
| <i>L. antri</i>          | <i>L. fuchuensis</i>        | <i>L. mucosae</i>          | <i>L. salivarius*</i>       |
| <i>L. apinorum</i>       | <i>L. gasseri</i>           | <i>L. mucosae*</i>         | <i>L. sanfranciscensis</i>  |
| <i>L. apis</i>           | <i>L. gastricus</i>         | <i>L. nagelii</i>          | <i>L. sanfranciscensis*</i> |
| <i>L. apis*</i>          | <i>L. ghanensis</i>         | <i>L. nasuensis</i>        | <i>L. saniviri</i>          |
| <i>L. aquaticus</i>      | <i>L. gigeriorum</i>        | <i>L. nodensis</i>         | <i>L. satsumensis</i>       |
| <i>L. aviarius</i>       | <i>L. ginsenosidimutans</i> | <i>L. odoratitofui</i>     | <i>L. secaliphilus</i>      |
| <i>L. bifermentans</i>   | <i>L. graminis</i>          | <i>L. oeni</i>             | <i>L. selangorensis</i>     |
| <i>L. brantae</i>        | <i>L. hamsteri</i>          | <i>L. oligofermentans</i>  | <i>L. senioris</i>          |
| <i>L. brevis</i>         | <i>L. harbinensis</i>       | <i>L. oryzae</i>           | <i>L. sharpeae</i>          |
| <i>L. brevis*</i>        | <i>L. hayakitensis</i>      | <i>L. ozensis</i>          | <i>L. shenzhenensis</i>     |
| <i>L. buchneri</i>       | <i>L. heilongjiangensis</i> | <i>L. panis</i>            | <i>L. siliginis</i>         |
| <i>L. buchneri*</i>      | <i>L. helveticus</i>        | <i>L. pantheris</i>        | <i>L. similis</i>           |
| <i>L. cacaonum</i>       | <i>L. herbarum</i>          | <i>L. parabrevis</i>       | <i>L. spicheri</i>          |
| <i>L. camelliae</i>      | <i>L. hilgardii</i>         | <i>L. parabuchneri</i>     | <i>L. sucicola</i>          |
| <i>L. capillatus</i>     | <i>L. hokkaidonensis</i>    | <i>L. parabuchneri*</i>    | <i>L. suebicus</i>          |
| <i>L. ceti</i>           | <i>L. hokkaidonensis*</i>   | <i>L. paracasei</i>        | <i>L. thailandensis</i>     |
| <i>L. coleohominis</i>   | <i>L. hominis</i>           | <i>L. paracasei*</i>       | <i>L. tucseti</i>           |
| <i>L. composti</i>       | <i>L. hordei</i>            | <i>L. paracollinoides</i>  | <i>L. uvarum</i>            |
| <i>L. concavus</i>       | <i>L. iners</i>             | <i>L. paracollinoides*</i> | <i>L. vaccinostercus</i>    |
| <i>L. coryniformis</i>   | <i>L. ingluviei</i>         | <i>L. parafarraginis</i>   | <i>L. vaginalis</i>         |
| <i>L. crispatus</i>      | <i>L. intestinalis</i>      | <i>L. paralimentarius</i>  | <i>L. versmoldensis</i>     |
| <i>L. crustorum</i>      | <i>L. jensenii</i>          | <i>L. pasteurii</i>        | <i>L. vini</i>              |
| <i>L. crustorum*</i>     | <i>L. kalixensis</i>        | <i>L. paucivorans</i>      | <i>L. wasatchensis</i>      |
| <i>L. curieae</i>        | <i>L. kefiranofaciens</i>   | <i>L. perolens</i>         | <i>L. xiangfangensis</i>    |
| <i>L. delbrueckii</i>    | <i>L. kefiranofaciens*</i>  | <i>L. plantarum</i>        |                             |
| <i>L. dextrinicus</i>    | <i>L. kimchicus</i>         | <i>L. plantarum*</i>       |                             |

Bacterial plasmids are denoted with an asterisk.

**Table S2. Common microbial genera (N=91, prevalence  $\geq 1\%$ , abundance  $\geq 0.1\%$ ).**

| Ace–Dia                | Die–Lac                       | Mar–Vei                      |
|------------------------|-------------------------------|------------------------------|
| <i>Acetivibrio</i>     | <i>Dielma</i>                 | <i>Marvinbryantia</i>        |
| <i>Acidaminococcus</i> | <i>Dorea</i>                  | <i>Megamonas</i>             |
| <i>Actinomyces</i>     | <i>Eggerthella</i>            | <i>Megasphaera</i>           |
| <i>Adlercreutzia</i>   | <i>Eisenbergiella</i>         | <i>Methanobrevibacter</i>    |
| <i>Akkermansia</i>     | <i>Enorma</i>                 | <i>Methanomassiliicoccus</i> |
| <i>Alistipes</i>       | <i>Enterobacter</i>           | <i>Mitsuokella</i>           |
| <i>Alloprevotella</i>  | <i>Enterococcus</i>           | <i>Odoribacter</i>           |
| <i>Anaerostipes</i>    | <i>Erysipelatoclostridium</i> | <i>Oscillibacter</i>         |
| <i>Anaerotruncus</i>   | <i>Escherichia</i>            | <i>Parabacteroides</i>       |
| <i>Bacteroides</i>     | <i>Escherichia*</i>           | <i>Paraprevotella</i>        |
| <i>Bacteroides*</i>    | <i>Eubacterium</i>            | <i>Parasutterella</i>        |
| <i>Barnesiella</i>     | <i>Eubacterium*</i>           | <i>Phascolarctobacterium</i> |
| <i>Bifidobacterium</i> | <i>Faecalibacterium</i>       | <i>Phoceia</i>               |
| <i>Bilophila</i>       | <i>Faecalicatena</i>          | <i>Porphyromonas</i>         |
| <i>Bittarella</i>      | <i>Faecalicoccus</i>          | <i>Prevotella</i>            |
| <i>Blautia</i>         | <i>Faecalitalea</i>           | <i>Roseburia</i>             |
| <i>Butyricicoccus</i>  | <i>Fournierella</i>           | <i>Ruminiclostridium</i>     |
| <i>Butyricimonas</i>   | <i>Gordonibacter</i>          | <i>Ruminococcus</i>          |
| <i>Butyrivibrio</i>    | <i>Haemophilus</i>            | <i>Ruthenibacterium</i>      |
| <i>Catenibacterium</i> | <i>Halapricum</i>             | <i>Sanguibacteroides</i>     |
| <i>Caudovirales</i>    | <i>Holdemanella</i>           | <i>Sellimonas</i>            |
| <i>Cellulomonas</i>    | <i>Holdemania</i>             | <i>Senegalimassilia</i>      |
| <i>Citrobacter</i>     | <i>Hungatella</i>             | <i>Shigella</i>              |
| <i>Clostridioides</i>  | <i>Intestinibacter</i>        | <i>Solobacterium</i>         |
| <i>Clostridium</i>     | <i>Johnsonella</i>            | <i>Streptococcus</i>         |
| <i>Collinsella</i>     | <i>Klebsiella</i>             | <i>Subdoligranulum</i>       |
| <i>Coprobacillus</i>   | <i>Klebsiella*</i>            | <i>Sutterella</i>            |
| <i>Coprobacter</i>     | <i>Kluyvera</i>               | <i>Tannerella</i>            |
| <i>Coprococcus</i>     | <i>Lachnoanaerobaculum</i>    | <i>Turicibacter</i>          |
| <i>Dakarella</i>       | <i>Lachnoclostridium</i>      | <i>Tyzzera</i>               |
| <i>Desulfovibrio</i>   | <i>Lactobacillus</i>          | <i>Veillonella</i>           |
| <i>Dialister</i>       | <i>Lactococcus</i>            |                              |

Bacterial plasmids are denoted with an asterisk.

**Table S3. Associations between blood pressure indices and microbial alpha diversity.**

|                        | Age- and sex-adjusted model |        | Multivariable-adjusted model |       |
|------------------------|-----------------------------|--------|------------------------------|-------|
|                        | $\beta$ (95%-CI)            | p      | $\beta$ (95%-CI)             | p     |
| Systolic BP            | -0.54 (-0.96 to -0.12)      | 0.012  | -0.20 (-0.62 to 0.21)        | 0.334 |
| Diastolic BP           | -0.31 (-0.56 to -0.06)      | 0.016  | -0.10 (-0.35 to 0.14)        | 0.404 |
| Mean arterial pressure | -0.39 (-0.66 to -0.12)      | 0.005  | -0.14 (-0.40 to 0.12)        | 0.304 |
| Pulse pressure         | -0.23 (-0.59 to 0.13)       | 0.203  | -0.10 (-0.46 to 0.26)        | 0.580 |
| Hypertension           | 0.91 (0.86 to 0.96)         | <0.001 | 0.98 (0.92 to 1.04)          | 0.498 |

Multivariable-adjusted model is adjusted for age, sex, BMI, smoking, exercise, diuretics, beta blockers, calcium channel blockers, and renin–angiotensin system blockers. BP, blood pressure.

**Table S4. Associations between blood pressure indices and microbial beta diversity.**

|                        | Age- and sex adjusted model |       | Multivariable adjusted model |       |
|------------------------|-----------------------------|-------|------------------------------|-------|
|                        | R <sup>2</sup>              | p     | R <sup>2</sup>               | p     |
| Systolic BP            | 0.046%                      | 0.001 | 0.018%                       | 0.195 |
| Diastolic BP           | 0.053%                      | 0.001 | 0.024%                       | 0.032 |
| Mean arterial pressure | 0.058%                      | 0.001 | 0.020%                       | 0.126 |
| Pulse pressure         | 0.024%                      | 0.038 | 0.020%                       | 0.086 |
| Hypertension           | 0.046%                      | 0.002 | 0.015%                       | 0.376 |

Analysis of variance for beta diversity was calculated using 999 permutations.

Multivariable-adjusted model is adjusted for age, sex, BMI, smoking, exercise, diuretics, beta blockers, calcium channel blockers, and renin–angiotensin system blockers. BP, blood pressure.

**Table S5. Associations between gut microbial genera and blood pressure indices.**

|                               | Systolic BP |        | Diastolic BP |        | Pulse pressure |        | Mean arterial pressure |        | Hypertension |        |
|-------------------------------|-------------|--------|--------------|--------|----------------|--------|------------------------|--------|--------------|--------|
|                               | Log2FC±SE   | p      | Log2FC±SE    | p      | Log2FC±SE      | p      | Log2FC±SE              | p      | Log2FC±SE    | p      |
| <i>Acidaminococcus</i>        |             |        | 0.32±0.04    | <0.001 | -0.29±0.04     | <0.001 | 0.20±0.04              | <0.001 |              |        |
| <i>Actinomyces</i>            |             |        | 0.04±0.01    | 0.011  | -0.03±0.01     | 0.045  |                        |        | 0.10±0.03    | 0.008  |
| <i>Adlercreutzia</i>          | -0.07±0.02  | 0.008  | -0.06±0.02   | 0.042  |                |        | -0.07±0.02             | 0.006  |              |        |
| <i>Alloprevotella</i>         |             |        |              |        |                |        |                        |        | -0.12±0.04   | 0.006  |
| <i>Anaerostipes</i>           | 0.06±0.02   | 0.015  |              |        |                |        |                        |        | 0.16±0.04    | <0.001 |
| <i>Anaerotruncus</i>          | -0.05±0.01  | <0.001 |              |        | -0.05±0.01     | <0.001 | -0.03±0.01             | 0.010  | -0.06±0.02   | 0.037  |
| <i>Bacteroides</i>            |             |        | 0.05±0.02    | 0.027  |                |        | 0.05±0.02              | 0.022  |              |        |
| <i>Bacteroides*</i>           |             |        | 0.17±0.04    | <0.001 |                |        | 0.16±0.04              | <0.001 |              |        |
| <i>Blautia</i>                | 0.04±0.01   | 0.015  | 0.03±0.01    | 0.038  |                |        | 0.04±0.01              | 0.008  | 0.11±0.03    | <0.001 |
| <i>Cellulomonas</i>           | 0.10±0.03   | 0.016  |              |        | 0.15±0.03      | <0.001 |                        |        |              |        |
| <i>Citrobacter</i>            |             |        | -0.43±0.04   | <0.001 | 0.17±0.04      | <0.001 | -0.33±0.04             | <0.001 | 0.35±0.10    | 0.002  |
| <i>Clostridioides</i>         |             |        | 0.13±0.02    | <0.001 | -0.12±0.02     | <0.001 | 0.09±0.02              | <0.001 |              |        |
| <i>Collinsella</i>            |             |        | 0.13±0.02    | <0.001 |                |        | 0.12±0.02              | <0.001 | 0.19±0.05    | 0.002  |
| <i>Coprobacillus</i>          | -0.12±0.02  | <0.001 | -0.06±0.02   | 0.006  | -0.10±0.02     | <0.001 | -0.10±0.02             | <0.001 | -0.20±0.04   | <0.001 |
| <i>Coprococcus</i>            | 0.05±0.01   | 0.004  |              |        | 0.05±0.01      | 0.004  |                        |        | 0.10±0.03    | 0.012  |
| <i>Desulfovibrio</i>          | 0.13±0.03   | <0.001 | 0.16±0.03    | <0.001 |                |        | 0.17±0.03              | <0.001 |              |        |
| <i>Dialister</i>              | 0.10±0.04   | 0.039  |              |        | 0.13±0.04      | 0.002  |                        |        |              |        |
| <i>Dielma</i>                 | 0.23±0.03   | <0.001 | 0.14±0.03    | <0.001 | 0.15±0.03      | <0.001 | 0.22±0.03              | <0.001 | 0.28±0.07    | 0.001  |
| <i>Dorea</i>                  |             |        |              |        |                |        |                        |        | 0.08±0.03    | 0.030  |
| <i>Eisenbergiella</i>         |             |        | 0.16±0.03    | <0.001 |                |        | 0.13±0.03              | <0.001 | 0.17±0.06    | 0.018  |
| <i>Enorma</i>                 |             |        |              |        |                |        |                        |        | 0.11±0.04    | 0.050  |
| <i>Enterobacter</i>           | 0.25±0.04   | <0.001 | -0.15±0.04   | <0.001 | 0.32±0.04      | <0.001 |                        |        | 0.89±0.09    | <0.001 |
| <i>Erysipelatoclostridium</i> |             |        | 0.06±0.02    | 0.006  |                |        | 0.05±0.02              | 0.031  | 0.13±0.04    | 0.011  |
| <i>Faecalicoccus</i>          | -0.05±0.02  | 0.041  |              |        | -0.06±0.02     | 0.003  |                        |        |              |        |
| <i>Faecalitalea</i>           |             |        |              |        |                |        |                        |        | 0.08±0.03    | 0.047  |

|                              | Systolic BP |        | Diastolic BP |        | Pulse pressure |        | Mean arterial pressure |        | Hypertension |        |
|------------------------------|-------------|--------|--------------|--------|----------------|--------|------------------------|--------|--------------|--------|
|                              | Log2FC±SE   | p      | Log2FC±SE    | p      | Log2FC±SE      | p      | Log2FC±SE              | p      | Log2FC±SE    | p      |
| <i>Fournierella</i>          | -0.02±0.01  | 0.022  |              |        |                |        | -0.03±0.01             | 0.015  | -0.07±0.02   | 0.002  |
| <i>Holdemania</i>            | 0.10±0.02   | <0.001 | 0.10±0.02    | <0.001 |                |        | 0.12±0.02              | <0.001 | 0.20±0.04    | <0.001 |
| <i>Hungatella</i>            | -0.09±0.02  | <0.001 |              |        | -0.09±0.02     | <0.001 | -0.06±0.02             | 0.006  |              |        |
| <i>Intestinibacter</i>       |             |        |              |        |                |        |                        |        | 0.17±0.06    | 0.030  |
| <i>Kluyvera</i>              |             |        | -0.26±0.04   | <0.001 | 0.24±0.04      | <0.001 | -0.11±0.04             | 0.047  | 0.55±0.09    | <0.001 |
| <i>Lachnoclostridium</i>     |             |        | 0.04±0.01    | 0.008  | -0.04±0.01     | 0.005  |                        |        |              |        |
| <i>Lactococcus</i>           |             |        |              |        |                |        |                        |        | 0.18±0.07    | 0.047  |
| <i>Megasphaera</i>           | 0.19±0.03   | <0.001 |              |        | 0.19±0.03      | <0.001 | 0.14±0.03              | <0.001 | 0.23±0.07    | 0.008  |
| <i>Mitsuokella</i>           | 0.15±0.04   | 0.001  | -0.14±0.04   | 0.001  | 0.25±0.04      | <0.001 |                        |        |              |        |
| <i>Paraprevotella</i>        | 0.09±0.03   | 0.017  |              |        | 0.10±0.03      | 0.005  |                        |        |              |        |
| <i>Parasutterella</i>        |             |        | -0.10±0.04   | 0.030  |                |        |                        |        |              |        |
| <i>Phascolarctobacterium</i> | 0.10±0.03   | 0.011  |              |        | 0.08±0.03      | 0.042  | 0.08±0.03              | 0.038  | 0.22±0.07    | 0.007  |
| <i>Prevotella</i>            |             |        | -0.09±0.03   | 0.048  |                |        |                        |        |              |        |
| <i>Ruthenibacterium</i>      | 0.07±0.02   | 0.004  |              |        | 0.08±0.02      | 0.001  |                        |        | 0.12±0.05    | 0.034  |
| <i>Sanguibacteroides</i>     |             |        | 0.08±0.02    | 0.005  |                |        | 0.08±0.02              | 0.006  |              |        |
| <i>Sellimonas</i>            |             |        | -0.15±0.02   | <0.001 | 0.09±0.02      | <0.001 | -0.10±0.02             | <0.001 |              |        |
| <i>Senegalimassilia</i>      |             |        |              |        |                |        |                        |        | -0.18±0.05   | 0.003  |
| <i>Solobacterium</i>         | -0.08±0.02  | 0.001  |              |        | -0.07±0.02     | 0.005  | -0.06±0.02             | 0.014  |              |        |
| <i>Sutterella</i>            | 0.11±0.04   | 0.010  | 0.11±0.03    | 0.008  |                |        | 0.13±0.04              | 0.002  |              |        |
| <i>Turicibacter</i>          | 0.16±0.04   | <0.001 | 0.13±0.03    | <0.001 | 0.09±0.03      | 0.030  | 0.17±0.04              | <0.001 |              |        |
| <i>Tyzzzerella</i>           |             |        | -0.04±0.01   | 0.033  |                |        |                        |        |              |        |

Models are adjusted for age, sex, BMI, smoking, exercise, diuretics, beta blockers, calcium channel blockers, and renin–angiotensin system blockers. Association with bacterial plasmid is denoted using asterisk. BP, blood pressure. Log2FC, base 2 log of fold change.

**Table S6. Associations between *Lactobacillus* species and blood pressure indices.**

|                         | Systolic BP |        | Diastolic BP |        | Pulse pressure |        | Mean arterial pressure |        | Hypertension |        |
|-------------------------|-------------|--------|--------------|--------|----------------|--------|------------------------|--------|--------------|--------|
|                         | Log2FC±SE   | p      | Log2FC±SE    | p      | Log2FC±SE      | p      | Log2FC±SE              | p      | Log2FC±SE    | p      |
| <i>L. agilis</i>        |             |        | -0.19±0.06   | 0.017  |                |        | -0.20±0.06             | 0.013  |              |        |
| <i>L. algidus</i>       |             |        |              |        |                |        |                        |        | 0.30±0.09    | 0.010  |
| <i>L. amylophilus</i>   |             |        | -0.22±0.06   | 0.003  |                |        |                        |        |              |        |
| <i>L. aviarius</i>      | -0.13±0.03  | 0.001  |              |        | -0.09±0.03     | 0.043  | -0.12±0.03             | 0.003  |              |        |
| <i>L. equicursoris</i>  |             |        |              |        |                |        |                        |        | -0.25±0.07   | 0.003  |
| <i>L. farciminis</i>    | -0.33±0.05  | <0.001 | -0.19±0.04   | <0.001 | -0.27±0.04     | <0.001 | -0.30±0.05             | <0.001 | -0.60±0.10   | <0.001 |
| <i>L. hominis</i>       | -0.26±0.04  | <0.001 |              |        | -0.27±0.04     | <0.001 | -0.16±0.04             | 0.003  | -0.42±0.09   | <0.001 |
| <i>L. iners</i>         | -0.18±0.05  | 0.013  | 0.44±0.05    | <0.001 | -0.43±0.05     | <0.001 | 0.17±0.05              | 0.02   | -0.45±0.11   | 0.001  |
| <i>L. jensenii</i>      |             |        |              |        | -0.16±0.05     | 0.011  |                        |        |              |        |
| <i>L. kalixensis</i>    | 0.23±0.07   | 0.013  |              |        |                |        | 0.22±0.06              | 0.013  |              |        |
| <i>L. kefirifaciens</i> | 0.20±0.06   | 0.025  |              |        |                |        |                        |        |              |        |
| <i>L. kimchicus</i>     |             |        |              |        | -0.61±0.19     | 0.025  | 0.65±0.20              | 0.023  |              |        |
| <i>L. parabuchneri</i>  |             |        |              |        |                |        |                        |        | 0.50±0.15    | 0.017  |
| <i>L. paracasei</i>     | -0.15±0.04  | 0.020  | -0.23±0.04   | <0.001 |                |        | -0.23±0.04             | <0.001 |              |        |
| <i>L. pasteurii</i>     |             |        |              |        | -0.12±0.03     | <0.001 |                        |        | -0.29±0.06   | <0.001 |
| <i>L. rhamnosus</i>     |             |        |              |        |                |        |                        |        | 0.65±0.12    | <0.001 |
| <i>L. ruminis</i>       |             |        | -0.32±0.04   | <0.001 |                |        | -0.26±0.04             | <0.001 | -0.49±0.08   | <0.001 |
| <i>L. sakei</i>         | 0.15±0.04   | 0.009  |              |        |                |        | 0.13±0.04              | 0.038  |              |        |
| <i>L. salivarius*</i>   |             |        |              |        | 0.52±0.11      | <0.001 |                        |        |              |        |



Models are adjusted for age, sex, BMI, smoking, exercise, diuretics, beta blockers, calcium channel blockers, and renin–angiotensin system blockers. Association with bacterial plasmid is denoted using asterisk. BP, blood pressure. Log<sub>2</sub>FC, base 2 log of fold change.

**Table S7. Associations between KO groups and systolic BP.**

| KO-group | Definition                                                             | $\beta$ (95%-CI)       | <i>P</i> |
|----------|------------------------------------------------------------------------|------------------------|----------|
| K00169   | pyruvate ferredoxin oxidoreductase alpha subunit                       | -0.04 (-0.06 to -0.02) | 0.029    |
| K00170   | pyruvate ferredoxin oxidoreductase beta subunit                        | -0.04 (-0.06 to -0.02) | 0.029    |
| K00171   | pyruvate ferredoxin oxidoreductase delta subunit                       | -0.04 (-0.06 to -0.02) | 0.029    |
| K00172   | pyruvate ferredoxin oxidoreductase gamma subunit                       | -0.04 (-0.06 to -0.02) | 0.029    |
| K00402   | methyl-coenzyme M reductase gamma subunit                              | -0.04 (-0.06 to -0.02) | 0.029    |
| K00581   | tetrahydromethanopterin S-methyltransferase subunit E                  | -0.04 (-0.06 to -0.02) | 0.029    |
| K01854   | UDP-galactopyranose mutase                                             | -0.04 (-0.06 to -0.02) | 0.029    |
| K02201   | pantetheine-phosphate adenylyltransferase                              | -0.04 (-0.06 to -0.02) | 0.029    |
| K02910   | large subunit ribosomal protein L31e                                   | -0.04 (-0.06 to -0.02) | 0.029    |
| K02944   | large subunit ribosomal protein LX                                     | -0.04 (-0.06 to -0.02) | 0.029    |
| K03049   | DNA-directed RNA polymerase subunit E'                                 | -0.04 (-0.06 to -0.02) | 0.029    |
| K03105   | signal recognition particle subunit SRP19                              | -0.04 (-0.06 to -0.02) | 0.029    |
| K03136   | transcription initiation factor TFIIE subunit alpha                    | -0.05 (-0.07 to -0.03) | 0.029    |
| K03538   | ribonuclease P protein subunit POP4                                    | -0.04 (-0.06 to -0.02) | 0.029    |
| K04801   | replication factor C small subunit                                     | -0.04 (-0.06 to -0.02) | 0.029    |
| K07060   | endoribonuclease Nob1                                                  | -0.04 (-0.06 to -0.02) | 0.029    |
| K07133   | uncharacterized protein                                                | -0.04 (-0.06 to -0.02) | 0.029    |
| K07143   | UPF0148 protein                                                        | -0.04 (-0.06 to -0.02) | 0.029    |
| K07333   | archaeal flagellar protein FlaJ                                        | -0.04 (-0.06 to -0.02) | 0.029    |
| K07722   | CopG family transcriptional regulator, nickel-responsive regulator     | -0.04 (-0.06 to -0.02) | 0.029    |
| K07730   | putative transcriptional regulator                                     | -0.04 (-0.06 to -0.02) | 0.029    |
| K07991   | archaeal preflagellin peptidase FlaK                                   | -0.04 (-0.06 to -0.02) | 0.029    |
| K09713   | uncharacterized protein                                                | -0.05 (-0.07 to -0.02) | 0.029    |
| K09738   | uncharacterized protein                                                | -0.04 (-0.06 to -0.02) | 0.029    |
| K12960   | 5-methylthioadenosine/S-adenosylhomocysteine deaminase                 | -0.04 (-0.06 to -0.02) | 0.029    |
| K13787   | geranylgeranyl diphosphate synthase, type I                            | -0.04 (-0.06 to -0.02) | 0.029    |
| K14100   | energy-converting hydrogenase A subunit I                              | -0.04 (-0.06 to -0.02) | 0.029    |
| K14104   | energy-converting hydrogenase A subunit M                              | -0.04 (-0.06 to -0.02) | 0.029    |
| K14561   | U3 small nucleolar ribonucleoprotein protein IMP4                      | -0.05 (-0.07 to -0.03) | 0.029    |
| K14654   | 2,5-diamino-6-(ribosylamino)-4(3H)-pyrimidinone 5'-phosphate reductase | -0.05 (-0.07 to -0.02) | 0.029    |
| K17104   | phosphoglycerol geranylgeranyltransferase                              | -0.04 (-0.06 to -0.02) | 0.029    |
| K18237   | ribose 1,5-bisphosphate isomerase                                      | -0.04 (-0.06 to -0.02) | 0.029    |
| K04800   | replication factor C large subunit                                     | -0.04 (-0.06 to -0.02) | 0.029    |
| K07739   | elongator complex protein 3                                            | -0.04 (-0.06 to -0.02) | 0.029    |
| K07142   | 2-amino-4-hydroxy-6-hydroxymethylidihydropteridine diphosphokinase     | -0.04 (-0.06 to -0.02) | 0.030    |
| K00180   | indolepyruvate ferredoxin oxidoreductase, beta subunit                 | -0.04 (-0.06 to -0.02) | 0.030    |
| K01251   | adenosylhomocysteinase                                                 | -0.04 (-0.06 to -0.02) | 0.030    |
| K02908   | large subunit ribosomal protein L30e                                   | -0.04 (-0.06 to -0.02) | 0.030    |
| K03234   | elongation factor 2                                                    | -0.04 (-0.06 to -0.02) | 0.030    |

|        |                                                                                        |                        |       |
|--------|----------------------------------------------------------------------------------------|------------------------|-------|
| K06875 | programmed cell death protein 5                                                        | -0.04 (-0.06 to -0.02) | 0.030 |
| K08981 | putative membrane protein                                                              | -0.04 (-0.06 to -0.02) | 0.030 |
| K17884 | archaetidylinositol phosphate synthase                                                 | -0.04 (-0.06 to -0.02) | 0.030 |
| K00651 | homoserine O-succinyltransferase/O-acetyltransferase                                   | -0.04 (-0.06 to -0.02) | 0.030 |
| K02885 | large subunit ribosomal protein L19e                                                   | -0.04 (-0.06 to -0.02) | 0.030 |
| K04518 | prephenate dehydratase                                                                 | -0.04 (-0.06 to -0.02) | 0.030 |
| K06218 | mRNA interferase RelE/StbE                                                             | -0.04 (-0.06 to -0.02) | 0.030 |
| K06898 | pyridinium-3,5-biscarboxylic acid mononucleotide synthase                              | -0.04 (-0.06 to -0.02) | 0.030 |
| K07166 | ACT domain-containing protein                                                          | -0.04 (-0.06 to -0.02) | 0.030 |
| K18882 | DNA primase large subunit                                                              | -0.04 (-0.06 to -0.02) | 0.030 |
| K03047 | DNA-directed RNA polymerase subunit D                                                  | -0.04 (-0.06 to -0.02) | 0.032 |
| K16306 | fructose-bisphosphate aldolase / 2-amino-3,7-dideoxy-D-threo-hept-6-ulosonate synthase | -0.04 (-0.06 to -0.02) | 0.032 |
| K00611 | ornithine carbamoyltransferase                                                         | -0.04 (-0.06 to -0.02) | 0.033 |
| K09157 | uncharacterized protein                                                                | -0.04 (-0.06 to -0.02) | 0.033 |
| K00262 | glutamate dehydrogenase (NADP+)                                                        | -0.04 (-0.06 to -0.02) | 0.034 |
| K00319 | methylenetetrahydromethanopterin dehydrogenase                                         | -0.04 (-0.06 to -0.02) | 0.034 |
| K01912 | phenylacetate-CoA ligase                                                               | -0.04 (-0.06 to -0.02) | 0.034 |
| K07727 | putative transcriptional regulator                                                     | -0.04 (-0.06 to -0.02) | 0.034 |
| K00058 | D-3-phosphoglycerate dehydrogenase / 2-oxoglutarate reductase                          | -0.04 (-0.06 to -0.02) | 0.034 |
| K00177 | 2-oxoglutarate ferredoxin oxidoreductase subunit gamma                                 | -0.04 (-0.06 to -0.02) | 0.034 |
| K00179 | indolepyruvate ferredoxin oxidoreductase, alpha subunit                                | -0.04 (-0.06 to -0.02) | 0.034 |
| K00184 | dimethyl sulfoxide reductase iron-sulfur subunit                                       | -0.04 (-0.06 to -0.02) | 0.034 |
| K00185 | dimethyl sulfoxide reductase membrane subunit                                          | -0.04 (-0.06 to -0.02) | 0.034 |
| K00582 | tetrahydromethanopterin S-methyltransferase subunit F                                  | -0.04 (-0.06 to -0.02) | 0.034 |
| K00818 | acetylnithine aminotransferase                                                         | -0.04 (-0.06 to -0.02) | 0.034 |
| K00930 | acetylglutamate kinase                                                                 | -0.04 (-0.06 to -0.02) | 0.034 |
| K00940 | nucleoside-diphosphate kinase                                                          | -0.04 (-0.06 to -0.02) | 0.034 |
| K01012 | biotin synthase                                                                        | -0.04 (-0.06 to -0.02) | 0.034 |
| K01091 | phosphoglycolate phosphatase                                                           | -0.04 (-0.06 to -0.02) | 0.034 |
| K01151 | deoxyribonuclease IV                                                                   | -0.04 (-0.06 to -0.02) | 0.034 |
| K01421 | putative membrane protein                                                              | -0.04 (-0.06 to -0.02) | 0.034 |
| K01439 | succinyl-diaminopimelate desuccinylase                                                 | -0.04 (-0.06 to -0.02) | 0.034 |
| K01478 | arginine deiminase                                                                     | -0.04 (-0.06 to -0.02) | 0.034 |
| K01482 | dimethylargininase                                                                     | -0.04 (-0.06 to -0.02) | 0.034 |
| K01523 | phosphoribosyl-ATP pyrophosphohydrolase                                                | -0.04 (-0.06 to -0.02) | 0.034 |
| K01693 | imidazoleglycerol-phosphate dehydratase                                                | -0.04 (-0.06 to -0.02) | 0.034 |
| K01885 | glutamyl-tRNA synthetase                                                               | -0.04 (-0.06 to -0.02) | 0.034 |
| K02195 | heme exporter protein C                                                                | -0.04 (-0.06 to -0.02) | 0.034 |
| K02198 | cytochrome c-type biogenesis protein CcmF                                              | -0.04 (-0.06 to -0.02) | 0.034 |
| K02203 | phosphoserine / homoserine phosphotransferase                                          | -0.04 (-0.06 to -0.02) | 0.034 |
| K02282 | pilus assembly protein CpaE                                                            | -0.04 (-0.06 to -0.02) | 0.034 |
| K02319 | DNA polymerase, archaea type                                                           | -0.04 (-0.06 to -0.02) | 0.034 |

|        |                                                                                          |                        |       |
|--------|------------------------------------------------------------------------------------------|------------------------|-------|
| K02434 | aspartyl-tRNA(Asn)/glutamyl-tRNA(Gln) amidotransferase subunit B                         | -0.04 (-0.06 to -0.02) | 0.034 |
| K02573 | ferredoxin-type protein NapG                                                             | -0.04 (-0.06 to -0.02) | 0.034 |
| K02574 | ferredoxin-type protein NapH                                                             | -0.04 (-0.06 to -0.02) | 0.034 |
| K02912 | large subunit ribosomal protein L32e                                                     | -0.04 (-0.06 to -0.02) | 0.034 |
| K02929 | large subunit ribosomal protein L44e                                                     | -0.04 (-0.06 to -0.02) | 0.034 |
| K02930 | large subunit ribosomal protein L4e                                                      | -0.04 (-0.06 to -0.02) | 0.034 |
| K03205 | type IV secretion system protein VirD4                                                   | -0.04 (-0.06 to -0.02) | 0.034 |
| K03385 | nitrite reductase (cytochrome c-552)                                                     | -0.04 (-0.06 to -0.02) | 0.034 |
| K03465 | thymidylate synthase (FAD)                                                               | -0.04 (-0.06 to -0.02) | 0.034 |
| K03498 | trk system potassium uptake protein                                                      | -0.04 (-0.06 to -0.02) | 0.034 |
| K03499 | trk system potassium uptake protein                                                      | -0.04 (-0.06 to -0.02) | 0.034 |
| K03540 | ribonuclease P protein subunit RPR2                                                      | -0.04 (-0.06 to -0.02) | 0.034 |
| K03655 | ATP-dependent DNA helicase RecG                                                          | -0.04 (-0.06 to -0.02) | 0.034 |
| K03758 | arginine:ornithine antiporter / lysine permease                                          | -0.04 (-0.06 to -0.02) | 0.034 |
| K04041 | fructose-1,6-bisphosphatase III                                                          | -0.04 (-0.06 to -0.02) | 0.034 |
| K04655 | hydrogenase expression/formation protein HypE                                            | -0.04 (-0.06 to -0.02) | 0.034 |
| K04656 | hydrogenase maturation protein HypF<br>alpha-D-ribose 1-methylphosphonate 5-triphosphate | -0.04 (-0.06 to -0.02) | 0.034 |
| K05780 | synthase subunit PhnL                                                                    | -0.04 (-0.06 to -0.02) | 0.034 |
| K05781 | putative phosphonate transport system ATP-binding protein                                | -0.04 (-0.06 to -0.02) | 0.034 |
| K06163 | alpha-D-ribose 1-methylphosphonate 5-phosphate C-P lyase                                 | -0.04 (-0.06 to -0.02) | 0.034 |
| K06914 | tyramine---L-glutamate ligase                                                            | -0.04 (-0.06 to -0.02) | 0.034 |
| K06915 | uncharacterized protein                                                                  | -0.04 (-0.06 to -0.02) | 0.034 |
| K06963 | tRNA acetyltransferase TAN1                                                              | -0.04 (-0.06 to -0.02) | 0.034 |
| K07079 | uncharacterized protein                                                                  | -0.04 (-0.06 to -0.02) | 0.034 |
| K07154 | serine/threonine-protein kinase HipA                                                     | -0.04 (-0.06 to -0.02) | 0.034 |
| K07307 | anaerobic dimethyl sulfoxide reductase subunit B                                         | -0.04 (-0.06 to -0.02) | 0.034 |
| K07308 | anaerobic dimethyl sulfoxide reductase subunit C                                         | -0.04 (-0.06 to -0.02) | 0.034 |
| K07309 | Tat-targeted selenate reductase subunit YnfE                                             | -0.04 (-0.06 to -0.02) | 0.034 |
| K07580 | Zn-ribbon RNA-binding protein<br>two-component system, OmpR family, response regulator   | -0.04 (-0.06 to -0.02) | 0.034 |
| K07776 | RegX3                                                                                    | -0.04 (-0.06 to -0.02) | 0.034 |
| K07979 | GntR family transcriptional regulator                                                    | -0.04 (-0.06 to -0.02) | 0.034 |
| K08372 | putative serine protease PepD                                                            | -0.04 (-0.06 to -0.02) | 0.034 |
| K08600 | sortase B                                                                                | -0.04 (-0.06 to -0.02) | 0.034 |
| K08979 | putative membrane protein<br>pyridinium-3,5-bisthiocarboxylic acid mononucleotide nickel | -0.04 (-0.06 to -0.02) | 0.034 |
| K09121 | chelatae<br>aspartate/glutamate/glutamine transport system permease                      | -0.04 (-0.06 to -0.02) | 0.034 |
| K10040 | protein                                                                                  | -0.04 (-0.06 to -0.02) | 0.034 |
| K10206 | LL-diaminopimelate aminotransferase                                                      | -0.04 (-0.06 to -0.02) | 0.034 |
| K11176 | IMP cyclohydrolase                                                                       | -0.04 (-0.06 to -0.02) | 0.034 |
| K11755 | phosphoribosyl-AMP cyclohydrolase / phosphoribosyl-ATP<br>pyrophosphohydrolase           | -0.04 (-0.06 to -0.02) | 0.034 |
| K11913 | type VI secretion system protein                                                         | -0.04 (-0.06 to -0.02) | 0.034 |

|        |                                                                                                                 |                        |       |
|--------|-----------------------------------------------------------------------------------------------------------------|------------------------|-------|
| K12257 | SecD/SecE fusion protein                                                                                        | -0.04 (-0.06 to -0.02) | 0.034 |
| K13252 | putrescine carbamoyltransferase                                                                                 | -0.04 (-0.06 to -0.02) | 0.034 |
| K13640 | MerR family transcriptional regulator, heat shock protein HspR                                                  | -0.04 (-0.06 to -0.02) | 0.034 |
| K13812 | bifunctional enzyme Fae/Hps                                                                                     | -0.04 (-0.06 to -0.02) | 0.034 |
| K14088 | ech hydrogenase subunit C                                                                                       | -0.04 (-0.06 to -0.02) | 0.034 |
| K14188 | D-alanine--poly(phosphoribitol) ligase subunit 2                                                                | -0.04 (-0.06 to -0.02) | 0.034 |
| K15429 | tRNA (guanine37-N1)-methyltransferase                                                                           | -0.04 (-0.06 to -0.02) | 0.034 |
| K16214 | UDP-N-acetylglucosamine kinase                                                                                  | -0.04 (-0.06 to -0.02) | 0.034 |
| K16793 | methanogen homoaconitase small subunit                                                                          | -0.04 (-0.06 to -0.02) | 0.034 |
| K20265 | glutamate:GABA antiporter                                                                                       | -0.04 (-0.06 to -0.02) | 0.034 |
| K00145 | N-acetyl-gamma-glutamyl-phosphate reductase                                                                     | -0.04 (-0.06 to -0.01) | 0.034 |
| K00176 | 2-oxoglutarate ferredoxin oxidoreductase subunit delta                                                          | -0.04 (-0.06 to -0.01) | 0.034 |
| K00399 | methyl-coenzyme M reductase alpha subunit                                                                       | -0.04 (-0.06 to -0.01) | 0.034 |
| K00613 | glycine amidinotransferase                                                                                      | -0.04 (-0.06 to -0.01) | 0.034 |
| K00666 | fatty-acyl-CoA synthase                                                                                         | -0.04 (-0.06 to -0.01) | 0.034 |
| K00846 | ketohexokinase                                                                                                  | -0.04 (-0.06 to -0.01) | 0.034 |
| K01372 | bleomycin hydrolase                                                                                             | -0.04 (-0.06 to -0.01) | 0.034 |
| K01470 | creatinine amidohydrolase                                                                                       | -0.04 (-0.06 to -0.01) | 0.034 |
| K01661 | naphthoate synthase                                                                                             | -0.04 (-0.06 to -0.01) | 0.034 |
| K02069 | putative ABC transport system permease protein aspartyl-tRNA(Asn)/glutamyl-tRNA(Gln) amidotransferase subunit C | -0.04 (-0.06 to -0.01) | 0.034 |
| K02435 | electron transfer flavoprotein beta subunit                                                                     | -0.04 (-0.06 to -0.01) | 0.034 |
| K03552 | holliday junction resolvase Hjr                                                                                 | -0.04 (-0.06 to -0.01) | 0.034 |
| K03739 | membrane protein involved in D-alanine export                                                                   | -0.04 (-0.06 to -0.02) | 0.034 |
| K04653 | hydrogenase expression/formation protein HypC                                                                   | -0.04 (-0.06 to -0.01) | 0.034 |
| K05516 | curved DNA-binding protein alpha-D-ribose 1-methylphosphonate 5-triphosphate diphosphatase                      | -0.04 (-0.06 to -0.01) | 0.034 |
| K06162 | mRNA interferase MazF                                                                                           | -0.04 (-0.06 to -0.01) | 0.034 |
| K07306 | anaerobic dimethyl sulfoxide reductase subunit A                                                                | -0.04 (-0.06 to -0.02) | 0.034 |
| K07402 | xanthine dehydrogenase accessory factor                                                                         | -0.04 (-0.06 to -0.01) | 0.034 |
| K07562 | nonsense-mediated mRNA decay protein 3                                                                          | -0.04 (-0.06 to -0.01) | 0.034 |
| K07581 | RNA-binding protein                                                                                             | -0.04 (-0.06 to -0.02) | 0.034 |
| K08177 | MFS transporter, OFA family, oxalate/formate antiporter                                                         | -0.04 (-0.06 to -0.02) | 0.034 |
| K08999 | uncharacterized protein                                                                                         | -0.04 (-0.06 to -0.01) | 0.034 |
| K09013 | Fe-S cluster assembly ATP-binding protein                                                                       | -0.04 (-0.06 to -0.01) | 0.034 |
| K09167 | uncharacterized protein                                                                                         | -0.04 (-0.06 to -0.01) | 0.034 |
| K10536 | agmatine deiminase                                                                                              | -0.04 (-0.06 to -0.01) | 0.034 |
| K11358 | aspartate aminotransferase                                                                                      | -0.04 (-0.06 to -0.02) | 0.034 |
| K11912 | serine/threonine-protein kinase PpkA                                                                            | -0.04 (-0.06 to -0.01) | 0.034 |
| K12136 | hydrogenase-4 component A                                                                                       | -0.04 (-0.06 to -0.02) | 0.034 |
| K12143 | hydrogenase-4 component H                                                                                       | -0.04 (-0.06 to -0.02) | 0.034 |
| K18926 | MFS transporter, DHA2 family, lincomycin resistance protein                                                     | -0.04 (-0.06 to -0.01) | 0.034 |

|        |                                                                                                              |                        |       |
|--------|--------------------------------------------------------------------------------------------------------------|------------------------|-------|
| K08744 | cardiolipin synthase (CMP-forming)                                                                           | -0.04 (-0.06 to -0.01) | 0.034 |
| K09790 | uncharacterized protein                                                                                      | -0.04 (-0.06 to -0.01) | 0.034 |
| K14086 | ech hydrogenase subunit A                                                                                    | -0.04 (-0.06 to -0.01) | 0.034 |
| K02322 | DNA polymerase II large subunit                                                                              | -0.04 (-0.06 to -0.01) | 0.035 |
| K00123 | formate dehydrogenase major subunit                                                                          | -0.03 (-0.06 to -0.01) | 0.035 |
| K01895 | acetyl-CoA synthetase                                                                                        | -0.03 (-0.06 to -0.01) | 0.035 |
| K01959 | pyruvate carboxylase subunit A                                                                               | -0.03 (-0.06 to -0.01) | 0.035 |
| K02279 | pilus assembly protein CpaB                                                                                  | -0.03 (-0.06 to -0.01) | 0.035 |
| K02927 | ubiquitin-large subunit ribosomal protein L40e                                                               | -0.04 (-0.06 to -0.01) | 0.035 |
| K03231 | elongation factor 1-alpha                                                                                    | -0.04 (-0.06 to -0.01) | 0.035 |
| K03522 | electron transfer flavoprotein alpha subunit                                                                 | -0.03 (-0.06 to -0.01) | 0.035 |
| K03783 | purine-nucleoside phosphorylase                                                                              | -0.03 (-0.06 to -0.01) | 0.035 |
| K06982 | pantoate kinase                                                                                              | -0.03 (-0.06 to -0.01) | 0.035 |
| K07558 | tRNA nucleotidyltransferase (CCA-adding enzyme)                                                              | -0.04 (-0.06 to -0.01) | 0.035 |
| K09730 | uncharacterized protein                                                                                      | -0.04 (-0.06 to -0.01) | 0.035 |
| K11741 | quaternary ammonium compound-resistance protein SugE<br>phosphoribosylformimino-5-aminoimidazole carboxamide | -0.03 (-0.06 to -0.01) | 0.035 |
| K01814 | ribotide isomerase                                                                                           | -0.03 (-0.06 to -0.01) | 0.035 |
| K00053 | ketol-acid reductoisomerase                                                                                  | -0.03 (-0.06 to -0.01) | 0.035 |
| K00931 | glutamate 5-kinase<br>aspartyl-tRNA(Asn)/glutamyl-tRNA(Gln) amidotransferase                                 | -0.03 (-0.06 to -0.01) | 0.035 |
| K02433 | subunit A                                                                                                    | -0.03 (-0.06 to -0.01) | 0.035 |
| K02614 | acyl-CoA thioesterase                                                                                        | -0.03 (-0.06 to -0.01) | 0.035 |
| K02683 | DNA primase small subunit                                                                                    | -0.03 (-0.06 to -0.01) | 0.035 |
| K03151 | tRNA uracil 4-sulfurtransferase                                                                              | -0.03 (-0.06 to -0.01) | 0.035 |
| K03622 | archaea-specific DNA-binding protein                                                                         | -0.03 (-0.06 to -0.01) | 0.035 |
| K06206 | sugar fermentation stimulation protein A                                                                     | -0.03 (-0.06 to -0.01) | 0.035 |
| K06921 | uncharacterized protein                                                                                      | -0.03 (-0.06 to -0.01) | 0.035 |
| K07164 | uncharacterized protein                                                                                      | -0.03 (-0.06 to -0.01) | 0.035 |
| K07452 | 5-methylcytosine-specific restriction enzyme B                                                               | -0.03 (-0.06 to -0.01) | 0.035 |
| K09693 | teichoic acid transport system ATP-binding protein                                                           | -0.03 (-0.06 to -0.01) | 0.035 |
| K02922 | large subunit ribosomal protein L37e                                                                         | -0.03 (-0.06 to -0.01) | 0.035 |
| K00052 | 3-isopropylmalate dehydrogenase                                                                              | -0.03 (-0.05 to -0.01) | 0.035 |
| K00286 | pyrroline-5-carboxylate reductase                                                                            | -0.03 (-0.05 to -0.01) | 0.035 |
| K00817 | histidinol-phosphate aminotransferase                                                                        | -0.03 (-0.05 to -0.01) | 0.035 |
| K00926 | carbamate kinase                                                                                             | -0.03 (-0.05 to -0.01) | 0.035 |
| K01129 | dGTPase<br>3-isopropylmalate/(R)-2-methylmalate dehydratase small                                            | -0.03 (-0.05 to -0.01) | 0.035 |
| K01704 | subunit                                                                                                      | -0.03 (-0.05 to -0.01) | 0.035 |
| K02042 | phosphonate transport system permease protein                                                                | -0.03 (-0.05 to -0.01) | 0.035 |
| K02068 | putative ABC transport system ATP-binding protein                                                            | -0.03 (-0.05 to -0.01) | 0.035 |
| K02653 | type IV pilus assembly protein PilC                                                                          | -0.03 (-0.05 to -0.01) | 0.035 |
| K03313 | Na <sup>+</sup> :H <sup>+</sup> antiporter, NhaA family                                                      | -0.03 (-0.05 to -0.01) | 0.035 |
| K03502 | DNA polymerase V                                                                                             | -0.03 (-0.05 to -0.01) | 0.035 |
| K03688 | ubiquinone biosynthesis protein                                                                              | -0.03 (-0.05 to -0.01) | 0.035 |

|        |                                                                                          |                        |       |
|--------|------------------------------------------------------------------------------------------|------------------------|-------|
| K05919 | superoxide reductase                                                                     | -0.03 (-0.05 to -0.01) | 0.035 |
| K06164 | alpha-D-ribose 1-methylphosphonate 5-triphosphate synthase subunit PhnI                  | -0.03 (-0.05 to -0.01) | 0.035 |
| K06165 | alpha-D-ribose 1-methylphosphonate 5-triphosphate synthase subunit PhnH                  | -0.03 (-0.05 to -0.01) | 0.035 |
| K06166 | alpha-D-ribose 1-methylphosphonate 5-triphosphate synthase subunit PhnG                  | -0.03 (-0.06 to -0.01) | 0.035 |
| K06196 | cytochrome c-type biogenesis protein                                                     | -0.03 (-0.05 to -0.01) | 0.035 |
| K06972 | presequence protease                                                                     | -0.03 (-0.05 to -0.01) | 0.035 |
| K07045 | uncharacterized protein                                                                  | -0.03 (-0.05 to -0.01) | 0.035 |
| K07126 | uncharacterized protein                                                                  | -0.03 (-0.05 to -0.01) | 0.035 |
| K07405 | alpha-amylase                                                                            | -0.03 (-0.05 to -0.01) | 0.035 |
| K08659 | dipeptidase                                                                              | -0.03 (-0.05 to -0.01) | 0.035 |
| K09773 | [pyruvate, water dikinase]-phosphate phosphotransferase /                                | -0.03 (-0.06 to -0.01) | 0.035 |
| K11928 | sodium/proline symporter                                                                 | -0.03 (-0.05 to -0.01) | 0.035 |
| K12410 | NAD-dependent deacetylase                                                                | -0.03 (-0.05 to -0.01) | 0.035 |
| K14564 | nucleolar protein 56                                                                     | -0.03 (-0.06 to -0.01) | 0.035 |
| K17828 | dihydroorotate dehydrogenase (NAD+) catalytic subunit                                    | -0.03 (-0.05 to -0.01) | 0.035 |
| K17870 | NADH oxidase (H2O2-forming)                                                              | -0.03 (-0.06 to -0.01) | 0.035 |
| K03116 | sec-independent protein translocase protein TatA                                         | -0.03 (-0.05 to -0.01) | 0.036 |
| K07220 | uncharacterized protein                                                                  | -0.03 (-0.05 to -0.01) | 0.036 |
| K16153 | glycogen phosphorylase/synthase                                                          | -0.03 (-0.05 to -0.01) | 0.036 |
| K19067 | cyclohexane-1-carbonyl-CoA dehydrogenase                                                 | -0.03 (-0.05 to -0.01) | 0.036 |
| K01733 | threonine synthase                                                                       | -0.03 (-0.05 to -0.01) | 0.036 |
| K02654 | leader peptidase (prepilin peptidase) / N-methyltransferase                              | -0.03 (-0.05 to -0.01) | 0.036 |
| K03183 | demethylmenaquinone methyltransferase / 2-methoxy-6-polyprenyl-1,4-benzoquinol methylase | -0.03 (-0.05 to -0.01) | 0.036 |
| K03307 | solute:Na+ symporter, SSS family                                                         | -0.03 (-0.05 to -0.01) | 0.036 |
| K03340 | diaminopimelate dehydrogenase                                                            | -0.03 (-0.05 to -0.01) | 0.036 |
| K06943 | nucleolar GTP-binding protein                                                            | -0.03 (-0.05 to -0.01) | 0.036 |
| K06962 | uncharacterized protein                                                                  | -0.03 (-0.05 to -0.01) | 0.036 |
| K07446 | tRNA (guanine10-N2)-dimethyltransferase                                                  | -0.03 (-0.05 to -0.01) | 0.036 |
| K12511 | tight adherence protein C                                                                | -0.03 (-0.05 to -0.01) | 0.036 |
| K16792 | methanogen homoaconitase large subunit                                                   | -0.03 (-0.05 to -0.01) | 0.036 |
| K19955 | alcohol dehydrogenase                                                                    | -0.03 (-0.05 to -0.01) | 0.036 |
| K07144 | 5-(aminomethyl)-3-furanmethanol phosphate kinase                                         | -0.03 (-0.05 to -0.01) | 0.036 |
| K01426 | amidase                                                                                  | -0.03 (-0.05 to -0.01) | 0.037 |
| K00174 | 2-oxoglutarate/2-oxoacid ferredoxin oxidoreductase subunit alpha                         | -0.03 (-0.05 to -0.01) | 0.037 |
| K00794 | 6,7-dimethyl-8-ribityllumazine synthase                                                  | -0.03 (-0.05 to -0.01) | 0.037 |
| K01649 | 2-isopropylmalate synthase                                                               | -0.03 (-0.05 to -0.01) | 0.037 |
| K01687 | dihydroxy-acid dehydratase                                                               | -0.03 (-0.05 to -0.01) | 0.037 |
| K02875 | large subunit ribosomal protein L14e                                                     | -0.03 (-0.05 to -0.01) | 0.037 |
| K03316 | monovalent cation:H+ antiporter, CPA1 family                                             | -0.03 (-0.05 to -0.01) | 0.037 |
| K08963 | methylthioribose-1-phosphate isomerase                                                   | -0.03 (-0.05 to -0.01) | 0.037 |
| K03243 | translation initiation factor 5B                                                         | -0.03 (-0.05 to -0.01) | 0.037 |

|        |                                                                               |                        |       |
|--------|-------------------------------------------------------------------------------|------------------------|-------|
| K00147 | glutamate-5-semialdehyde dehydrogenase                                        | -0.03 (-0.05 to -0.01) | 0.037 |
| K03722 | ATP-dependent DNA helicase DinG                                               | -0.03 (-0.05 to -0.01) | 0.037 |
| K16926 | energy-coupling factor transport system substrate-specific component          | -0.03 (-0.05 to -0.01) | 0.037 |
| K02197 | cytochrome c-type biogenesis protein CcmE                                     | -0.03 (-0.05 to -0.01) | 0.037 |
| K03242 | translation initiation factor 2 subunit 3                                     | -0.03 (-0.05 to -0.01) | 0.037 |
| K08096 | GTP cyclohydrolase IIa                                                        | -0.03 (-0.05 to -0.01) | 0.037 |
| K18828 | tRNA(fMet)-specific endonuclease VapC                                         | -0.03 (-0.05 to -0.01) | 0.037 |
| K03306 | inorganic phosphate transporter, PiT family                                   | -0.03 (-0.05 to -0.01) | 0.038 |
| K15449 | tRNA wybutosine-synthesizing protein 1                                        | -0.03 (-0.05 to -0.01) | 0.038 |
| K08352 | thiosulfate reductase / polysulfide reductase chain A                         | -0.03 (-0.05 to -0.01) | 0.038 |
| K10254 | oleate hydratase                                                              | -0.03 (-0.05 to -0.01) | 0.038 |
| K00313 | electron transfer flavoprotein-quinone oxidoreductase                         | -0.03 (-0.05 to -0.01) | 0.039 |
| K00442 | coenzyme F420 hydrogenase subunit delta                                       | -0.03 (-0.05 to -0.01) | 0.039 |
| K00868 | pyridoxine kinase                                                             | -0.03 (-0.05 to -0.01) | 0.039 |
| K01710 | dTDP-glucose 4,6-dehydratase                                                  | -0.03 (-0.05 to -0.01) | 0.039 |
| K02564 | glucosamine-6-phosphate deaminase                                             | -0.03 (-0.05 to -0.01) | 0.039 |
| K02669 | twitching motility protein PilT                                               | -0.03 (-0.05 to -0.01) | 0.039 |
| K03639 | GTP 3',8-cyclase                                                              | -0.03 (-0.05 to -0.01) | 0.039 |
| K04751 | nitrogen regulatory protein P-II 1                                            | -0.03 (-0.05 to -0.01) | 0.039 |
| K09138 | uncharacterized protein                                                       | -0.03 (-0.05 to -0.01) | 0.039 |
| K12589 | exosome complex component RRP42                                               | -0.03 (-0.05 to -0.01) | 0.039 |
| K15888 | tritrans,polycis-undecaprenyl-diphosphate synthase                            | -0.03 (-0.05 to -0.01) | 0.039 |
| K16785 | energy-coupling factor transport system permease protein                      | -0.03 (-0.05 to -0.01) | 0.039 |
| K00548 | 5-methyltetrahydrofolate--homocysteine methyltransferase                      | -0.03 (-0.05 to -0.01) | 0.039 |
| K00764 | amidophosphoribosyltransferase                                                | -0.03 (-0.05 to -0.01) | 0.039 |
| K01524 | exopolyphosphatase / guanosine-5'-triphosphate,3'-diphosphate pyrophosphatase | -0.03 (-0.05 to -0.01) | 0.039 |
| K01571 | oxaloacetate decarboxylase (Na <sup>+</sup> extruding) subunit alpha          | -0.03 (-0.05 to -0.01) | 0.039 |
| K02019 | molybdate transport system regulatory protein                                 | -0.03 (-0.05 to -0.01) | 0.039 |
| K02283 | pilus assembly protein CpaF                                                   | -0.03 (-0.05 to -0.01) | 0.039 |
| K03427 | type I restriction enzyme M protein                                           | -0.03 (-0.05 to -0.01) | 0.039 |
| K03620 | Ni/Fe-hydrogenase 1 B-type cytochrome subunit                                 | -0.03 (-0.05 to -0.01) | 0.039 |
| K05837 | rod shape determining protein RodA                                            | -0.03 (-0.05 to -0.01) | 0.039 |
| K06935 | uncharacterized protein                                                       | -0.03 (-0.05 to -0.01) | 0.039 |
| K06953 | uncharacterized protein                                                       | -0.03 (-0.05 to -0.01) | 0.039 |
| K08681 | 5'-phosphate synthase pdxT subunit                                            | -0.03 (-0.05 to -0.01) | 0.039 |
| K11041 | exfoliative toxin A/B                                                         | -0.03 (-0.05 to -0.01) | 0.039 |
| K11927 | ATP-dependent RNA helicase RhlE                                               | -0.03 (-0.05 to -0.01) | 0.039 |
| K00762 | orotate phosphoribosyltransferase                                             | -0.03 (-0.05 to -0.01) | 0.039 |
| K01006 | pyruvate, orthophosphate dikinase                                             | -0.03 (-0.05 to -0.01) | 0.039 |
| K01499 | methenyltetrahydromethanopterin cyclohydrolase                                | -0.03 (-0.05 to -0.01) | 0.039 |
| K01653 | acetolactate synthase I/III small subunit                                     | -0.03 (-0.05 to -0.01) | 0.039 |
| K01681 | aconitate hydratase                                                           | -0.03 (-0.05 to -0.01) | 0.039 |



|        |                                                                                        |                        |       |
|--------|----------------------------------------------------------------------------------------|------------------------|-------|
| K02823 | dihydroorotate dehydrogenase electron transfer subunit                                 | -0.03 (-0.05 to -0.01) | 0.039 |
| K03051 | DNA-directed RNA polymerase subunit F                                                  | -0.03 (-0.05 to -0.01) | 0.039 |
| K05715 | 2-phosphoglycerate kinase                                                              | -0.03 (-0.05 to -0.01) | 0.039 |
| K07533 | foldase protein PrsA                                                                   | -0.03 (-0.05 to -0.01) | 0.039 |
| K15830 | formate hydrogenlyase subunit 5                                                        | -0.03 (-0.05 to -0.01) | 0.039 |
| K15669 | D-glycero-alpha-D-manno-heptose 1-phosphate<br>guanylyltransferase                     | -0.03 (-0.05 to -0.01) | 0.040 |
| K00789 | S-adenosylmethionine synthetase                                                        | -0.03 (-0.05 to -0.01) | 0.040 |
| K02217 | ferritin                                                                               | -0.03 (-0.05 to -0.01) | 0.040 |
| K00555 | tRNA (guanine26-N2/guanine27-N2)-dimethyltransferase                                   | -0.03 (-0.05 to -0.01) | 0.040 |
| K02017 | molybdate transport system ATP-binding protein                                         | -0.03 (-0.05 to -0.01) | 0.040 |
| K06610 | MFS transporter, SP family, inositol transporter                                       | -0.03 (-0.05 to -0.01) | 0.040 |
| K09153 | small membrane protein                                                                 | -0.03 (-0.05 to -0.01) | 0.040 |
| K00003 | homoserine dehydrogenase                                                               | -0.03 (-0.05 to -0.01) | 0.041 |
| K00175 | 2-oxoglutarate/2-oxoacid ferredoxin oxidoreductase subunit<br>beta                     | -0.03 (-0.05 to -0.01) | 0.041 |
| K00848 | rhamnulokinase                                                                         | -0.03 (-0.05 to -0.01) | 0.041 |
| K01737 | 6-pyruvoyltetrahydropterin/6-carboxytetrahydropterin<br>synthase                       | -0.03 (-0.05 to -0.01) | 0.041 |
| K01915 | glutamine synthetase                                                                   | -0.03 (-0.05 to -0.01) | 0.041 |
| K01937 | CTP synthase                                                                           | -0.03 (-0.05 to -0.01) | 0.041 |
| K02977 | ubiquitin-small subunit ribosomal protein S27Ae                                        | -0.03 (-0.05 to -0.01) | 0.041 |
| K03106 | signal recognition particle subunit SRP54                                              | -0.03 (-0.05 to -0.01) | 0.041 |
| K03150 | 2-iminoacetate synthase                                                                | -0.03 (-0.05 to -0.01) | 0.041 |
| K03696 | ATP-dependent Clp protease ATP-binding subunit ClpC                                    | -0.03 (-0.05 to -0.01) | 0.041 |
| K04773 | protease IV                                                                            | -0.03 (-0.05 to -0.01) | 0.041 |
| K07569 | RNA-binding protein                                                                    | -0.03 (-0.05 to -0.01) | 0.041 |
| K07704 | two-component system, LytTR family, sensor histidine kinase<br>LytS                    | -0.03 (-0.05 to -0.01) | 0.041 |
| K10117 | raffinose/stachyose/melibiose transport system substrate-<br>binding protein           | -0.03 (-0.05 to -0.01) | 0.041 |
| K14652 | 3,4-dihydroxy 2-butanone 4-phosphate synthase / GTP<br>cyclohydrolase II               | -0.03 (-0.05 to -0.01) | 0.041 |
| K18350 | two-component system, OmpR family, sensor histidine<br>kinase VanS                     | -0.03 (-0.05 to -0.01) | 0.041 |
| K18704 | CDP-ribitol ribitolphosphotransferase / teichoic acid ribitol-<br>phosphate polymerase | -0.03 (-0.05 to -0.01) | 0.041 |
| K01493 | dCMP deaminase                                                                         | -0.03 (-0.05 to -0.01) | 0.041 |
| K03856 | 3-deoxy-7-phosphoheptulonate synthase                                                  | -0.03 (-0.05 to -0.01) | 0.041 |
| K07738 | transcriptional repressor NrdR                                                         | -0.03 (-0.05 to -0.01) | 0.041 |
| K09735 | uncharacterized protein                                                                | -0.03 (-0.05 to -0.01) | 0.041 |
| K12240 | pyochelin synthetase                                                                   | -0.03 (-0.05 to -0.01) | 0.041 |
| K14656 | FAD synthetase                                                                         | -0.03 (-0.05 to -0.01) | 0.041 |
| K20859 | phosphoribosyl 1,2-cyclic phosphate 1,2-<br>diphosphodiesterase                        | -0.03 (-0.05 to -0.01) | 0.041 |
| K09767 | cyclic-di-GMP-binding protein                                                          | -0.03 (-0.05 to -0.01) | 0.041 |
| K02567 | nitrate reductase (cytochrome)                                                         | -0.03 (-0.05 to -0.01) | 0.041 |
| K03627 | putative transcription factor                                                          | -0.03 (-0.05 to -0.01) | 0.041 |

|        |                                                                           |                        |       |
|--------|---------------------------------------------------------------------------|------------------------|-------|
| K03646 | colicin import membrane protein                                           | -0.03 (-0.05 to -0.01) | 0.041 |
| K19137 | CRISPR-associated protein Csn2                                            | -0.03 (-0.05 to -0.01) | 0.041 |
| K01873 | valyl-tRNA synthetase                                                     | -0.03 (-0.05 to -0.01) | 0.041 |
| K01874 | methionyl-tRNA synthetase                                                 | -0.03 (-0.05 to -0.01) | 0.041 |
| K01939 | adenylosuccinate synthase                                                 | -0.03 (-0.05 to -0.01) | 0.041 |
| K03237 | translation initiation factor 2 subunit 1                                 | -0.03 (-0.05 to -0.01) | 0.041 |
| K03602 | exodeoxyribonuclease VII small subunit                                    | -0.03 (-0.05 to -0.01) | 0.041 |
| K07572 | putative nucleotide binding protein                                       | -0.03 (-0.05 to -0.01) | 0.041 |
| K07334 | toxin HigB-1                                                              | -0.03 (-0.05 to -0.01) | 0.042 |
| K01938 | formate--tetrahydrofolate ligase                                          | -0.03 (-0.05 to -0.01) | 0.042 |
| K04654 | hydrogenase expression/formation protein HypD                             | -0.03 (-0.05 to -0.01) | 0.042 |
| K00031 | isocitrate dehydrogenase                                                  | -0.03 (-0.05 to -0.01) | 0.042 |
| K06937 | 7,8-dihydro-6-hydroxymethylpterin dimethyltransferase                     | -0.03 (-0.05 to -0.01) | 0.042 |
| K00125 | formate dehydrogenase (coenzyme F420) beta subunit                        | -0.03 (-0.05 to -0.01) | 0.042 |
| K00891 | shikimate kinase                                                          | -0.03 (-0.05 to -0.01) | 0.042 |
| K01740 | O-acetylhomoserine (thiol)-lyase                                          | -0.03 (-0.05 to -0.01) | 0.042 |
| K01868 | threonyl-tRNA synthetase                                                  | -0.03 (-0.05 to -0.01) | 0.042 |
| K02551 | 2-succinyl-5-enolpyruvyl-6-hydroxy-3-cyclohexene-1-carboxylate synthase   | -0.03 (-0.05 to -0.01) | 0.042 |
| K03282 | large conductance mechanosensitive channel                                | -0.03 (-0.05 to -0.01) | 0.042 |
| K04517 | prephenate dehydrogenase                                                  | -0.03 (-0.05 to -0.01) | 0.042 |
| K07076 | uncharacterized protein                                                   | -0.03 (-0.05 to -0.01) | 0.042 |
| K18918 | RHH-type transcriptional regulator, rel operon repressor / antitoxin RelB | -0.03 (-0.05 to -0.01) | 0.042 |
| K00991 | 2-C-methyl-D-erythritol 4-phosphate cytidyltransferase                    | -0.03 (-0.05 to -0.01) | 0.042 |
| K01170 | tRNA-intron endonuclease, archaea type                                    | -0.03 (-0.05 to -0.01) | 0.042 |
| K04652 | hydrogenase nickel incorporation protein HypB                             | -0.03 (-0.05 to -0.01) | 0.043 |
| K03057 | transcription factor S                                                    | -0.03 (-0.05 to -0.01) | 0.043 |
| K07134 | uncharacterized protein                                                   | -0.03 (-0.05 to -0.01) | 0.043 |
| K01883 | cysteinyl-tRNA synthetase                                                 | -0.03 (-0.05 to -0.01) | 0.044 |
| K00077 | 2-dehydropantoate 2-reductase                                             | -0.03 (-0.05 to -0.01) | 0.044 |
| K00443 | coenzyme F420 hydrogenase subunit gamma                                   | -0.03 (-0.05 to -0.01) | 0.044 |
| K01579 | aspartate 1-decarboxylase                                                 | -0.03 (-0.05 to -0.01) | 0.044 |
| K01755 | argininosuccinate lyase                                                   | -0.03 (-0.05 to -0.01) | 0.044 |
| K02323 | DNA polymerase II small subunit                                           | -0.03 (-0.05 to -0.01) | 0.044 |
| K05934 | precorrin-3B C17-methyltransferase                                        | -0.03 (-0.05 to -0.01) | 0.044 |
| K09141 | uncharacterized protein                                                   | -0.03 (-0.05 to -0.01) | 0.044 |
| K11717 | cysteine desulfurase / selenocysteine lyase                               | -0.03 (-0.05 to -0.01) | 0.044 |
| K09724 | uncharacterized protein                                                   | -0.03 (-0.05 to -0.01) | 0.044 |
| K01104 | protein-tyrosine phosphatase                                              | -0.03 (-0.05 to -0.01) | 0.044 |
| K03055 | DNA-directed RNA polymerase subunit K                                     | -0.03 (-0.05 to -0.01) | 0.044 |
| K03687 | molecular chaperone GrpE                                                  | -0.03 (-0.05 to -0.01) | 0.044 |
| K01155 | type II restriction enzyme                                                | -0.03 (-0.05 to -0.01) | 0.044 |
| K03421 | methyl-coenzyme M reductase subunit C                                     | -0.03 (-0.05 to -0.01) | 0.044 |

|        |                                                            |                        |       |
|--------|------------------------------------------------------------|------------------------|-------|
| K19545 | lincosamide nucleotidyltransferase A/C/D/E                 | -0.03 (-0.05 to -0.01) | 0.044 |
| K00793 | riboflavin synthase                                        | -0.03 (-0.05 to -0.01) | 0.045 |
| K04766 | acetoin utilization protein AcuA                           | -0.03 (-0.05 to -0.01) | 0.045 |
| K08972 | putative membrane protein                                  | -0.03 (-0.05 to -0.01) | 0.045 |
| K04043 | molecular chaperone DnaK                                   | -0.03 (-0.05 to -0.01) | 0.045 |
| K11131 | H/ACA ribonucleoprotein complex subunit 4                  | -0.03 (-0.05 to -0.01) | 0.045 |
| K01265 | methionyl aminopeptidase                                   | -0.03 (-0.05 to -0.01) | 0.045 |
| K02492 | glutamyl-tRNA reductase                                    | -0.03 (-0.05 to -0.01) | 0.045 |
| K02988 | small subunit ribosomal protein S5                         | -0.03 (-0.05 to -0.01) | 0.045 |
| K03310 | alanine or glycine:cation symporter, AGCS family           | -0.03 (-0.05 to -0.01) | 0.045 |
| K03534 | L-rhamnose mutarotase                                      | -0.03 (-0.05 to -0.01) | 0.045 |
| K03686 | molecular chaperone DnaJ                                   | -0.03 (-0.05 to -0.01) | 0.045 |
| K06147 | ATP-binding cassette, subfamily B, bacterial               | -0.03 (-0.05 to -0.01) | 0.045 |
| K06862 | energy-converting hydrogenase B subunit Q                  | -0.03 (-0.05 to -0.01) | 0.045 |
| K08316 | 16S rRNA (guanine966-N2)-methyltransferase                 | -0.03 (-0.05 to -0.01) | 0.045 |
| K07271 | lipopolysaccharide cholinephosphotransferase               | -0.03 (-0.05 to -0.01) | 0.045 |
| K09726 | uncharacterized protein                                    | -0.03 (-0.05 to -0.01) | 0.045 |
| K14128 | F420-non-reducing hydrogenase small subunit                | -0.03 (-0.05 to -0.01) | 0.045 |
| K00600 | glycine hydroxymethyltransferase                           | -0.03 (-0.05 to -0.01) | 0.046 |
| K09714 | uncharacterized protein                                    | -0.03 (-0.05 to -0.01) | 0.046 |
| K00590 | site-specific DNA-methyltransferase (cytosine-N4-specific) | -0.03 (-0.05 to -0.01) | 0.046 |
| K01866 | tyrosyl-tRNA synthetase                                    | -0.03 (-0.05 to -0.01) | 0.046 |
| K03637 | cyclic pyranopterin monophosphate synthase                 | -0.03 (-0.05 to -0.01) | 0.046 |
| K05896 | segregation and condensation protein A                     | -0.03 (-0.05 to -0.01) | 0.046 |
| K07310 | Tat-targeted selenate reductase subunit YnfF               | -0.03 (-0.05 to -0.01) | 0.046 |
| K14113 | energy-converting hydrogenase B subunit D                  | -0.03 (-0.05 to -0.01) | 0.046 |
| K14125 | energy-converting hydrogenase B subunit P                  | -0.03 (-0.05 to -0.01) | 0.046 |
| K19147 | 5-methylcytosine-specific restriction enzyme subunit McrC  | -0.03 (-0.05 to -0.01) | 0.046 |
| K01179 | endoglucanase                                              | -0.03 (-0.05 to -0.01) | 0.046 |
| K01872 | alanyl-tRNA synthetase                                     | -0.03 (-0.05 to -0.01) | 0.046 |
| K03976 | Cys-tRNA(Pro)/Cys-tRNA(Cys) deacylase                      | -0.03 (-0.05 to -0.01) | 0.046 |
| K06200 | carbon starvation protein                                  | -0.03 (-0.05 to -0.01) | 0.046 |
| K07030 | uncharacterized protein                                    | -0.03 (-0.05 to -0.01) | 0.046 |
| K14111 | energy-converting hydrogenase B subunit B                  | -0.03 (-0.05 to -0.01) | 0.046 |
| K14116 | energy-converting hydrogenase B subunit G                  | -0.03 (-0.05 to -0.01) | 0.046 |
| K14119 | energy-converting hydrogenase B subunit J                  | -0.03 (-0.05 to -0.01) | 0.046 |
| K14120 | energy-converting hydrogenase B subunit K                  | -0.03 (-0.05 to -0.01) | 0.046 |
| K14122 | energy-converting hydrogenase B subunit M                  | -0.03 (-0.05 to -0.01) | 0.046 |
| K14123 | energy-converting hydrogenase B subunit N                  | -0.03 (-0.05 to -0.01) | 0.046 |
| K00440 | coenzyme F420 hydrogenase subunit alpha                    | -0.03 (-0.05 to -0.01) | 0.046 |
| K02035 | peptide/nickel transport system substrate-binding protein  | -0.03 (-0.05 to -0.01) | 0.046 |
| K02189 | cobalt-precorrin 5A hydrolase                              | -0.03 (-0.05 to -0.01) | 0.046 |
| K02866 | large subunit ribosomal protein L10e                       | -0.03 (-0.05 to -0.01) | 0.046 |

|        |                                                                                                       |                        |       |
|--------|-------------------------------------------------------------------------------------------------------|------------------------|-------|
| K07111 | uncharacterized protein                                                                               | -0.03 (-0.05 to -0.01) | 0.046 |
| K20021 | L-cysteine desulfidase                                                                                | -0.03 (-0.05 to -0.01) | 0.046 |
| K00244 | fumarate reductase flavoprotein subunit                                                               | -0.03 (-0.05 to -0.01) | 0.046 |
| K03042 | DNA-directed RNA polymerase subunit A"                                                                | -0.03 (-0.05 to -0.01) | 0.047 |
| K06920 | 7-cyano-7-deazaguanine synthase                                                                       | -0.03 (-0.05 to -0.01) | 0.047 |
| K12297 | 23S rRNA (guanine2445-N2)-methyltransferase / 23S rRNA (guanine2069-N7)-methyltransferase             | -0.03 (-0.05 to -0.01) | 0.047 |
| K00219 | 2,4-dienoyl-CoA reductase (NADPH2) succinate dehydrogenase / fumarate reductase, flavoprotein subunit | -0.03 (-0.05 to -0.01) | 0.047 |
| K00239 | glutaminase                                                                                           | -0.03 (-0.05 to -0.01) | 0.047 |
| K01425 | cysteine synthase                                                                                     | -0.03 (-0.05 to -0.01) | 0.047 |
| K01738 | large subunit ribosomal protein L3                                                                    | -0.03 (-0.05 to -0.01) | 0.047 |
| K04651 | hydrogenase nickel incorporation protein HypA/HybF                                                    | -0.03 (-0.05 to -0.01) | 0.047 |
| K07068 | uncharacterized protein                                                                               | -0.03 (-0.05 to -0.01) | 0.047 |
| K09721 | uncharacterized protein                                                                               | -0.03 (-0.05 to -0.01) | 0.047 |
| K09732 | uncharacterized protein                                                                               | -0.03 (-0.05 to -0.01) | 0.047 |
| K09742 | uncharacterized protein                                                                               | -0.03 (-0.05 to -0.01) | 0.047 |
| K10553 | fructose transport system permease protein                                                            | -0.03 (-0.05 to -0.01) | 0.047 |
| K14110 | energy-converting hydrogenase B subunit A                                                             | -0.03 (-0.05 to -0.01) | 0.047 |
| K14112 | energy-converting hydrogenase B subunit C                                                             | -0.03 (-0.05 to -0.01) | 0.047 |
| K14114 | energy-converting hydrogenase B subunit E                                                             | -0.03 (-0.05 to -0.01) | 0.047 |
| K14115 | energy-converting hydrogenase B subunit F                                                             | -0.03 (-0.05 to -0.01) | 0.047 |
| K14121 | energy-converting hydrogenase B subunit L                                                             | -0.03 (-0.05 to -0.01) | 0.047 |
| K14124 | energy-converting hydrogenase B subunit O                                                             | -0.03 (-0.05 to -0.01) | 0.047 |
| K15773 | HTH-type transcriptional regulator / antitoxin HipB                                                   | -0.03 (-0.05 to -0.01) | 0.047 |
| K00558 | DNA (cytosine-5)-methyltransferase 1                                                                  | -0.03 (-0.05 to -0.01) | 0.047 |
| K02548 | 1,4-dihydroxy-2-naphthoate polyprenyltransferase                                                      | -0.03 (-0.05 to -0.01) | 0.047 |
| K02570 | periplasmic nitrate reductase NapD                                                                    | -0.03 (-0.05 to -0.01) | 0.047 |
| K02881 | large subunit ribosomal protein L18                                                                   | -0.03 (-0.05 to -0.01) | 0.048 |
| K02907 | large subunit ribosomal protein L30                                                                   | -0.03 (-0.05 to -0.01) | 0.048 |
| K03969 | phage shock protein A                                                                                 | -0.03 (-0.05 to -0.01) | 0.048 |
| K08357 | tetrathionate reductase subunit A                                                                     | -0.03 (-0.05 to -0.01) | 0.048 |
| K01520 | dUTP pyrophosphatase                                                                                  | -0.03 (-0.05 to -0.01) | 0.048 |
| K01547 | potassium-transporting ATPase ATP-binding subunit                                                     | -0.03 (-0.05 to -0.01) | 0.048 |
| K00609 | aspartate carbamoyltransferase catalytic subunit                                                      | -0.03 (-0.05 to -0.01) | 0.048 |
| K01588 | 5-(carboxyamino)imidazole ribonucleotide mutase                                                       | -0.03 (-0.05 to -0.01) | 0.048 |
| K03168 | DNA topoisomerase I                                                                                   | -0.03 (-0.05 to -0.01) | 0.048 |
| K11175 | phosphoribosylglycinamide formyltransferase 1                                                         | -0.03 (-0.05 to -0.01) | 0.048 |
| K03330 | glutamyl-tRNA(Gln) amidotransferase subunit E                                                         | -0.03 (-0.05 to -0.01) | 0.048 |
| K03529 | chromosome segregation protein                                                                        | -0.03 (-0.05 to -0.01) | 0.048 |
| K03750 | molybdopterin molybdotransferase                                                                      | -0.03 (-0.05 to -0.01) | 0.048 |
| K07812 | trimethylamine-N-oxide reductase (cytochrome c)                                                       | -0.03 (-0.05 to -0.01) | 0.048 |
| K18209 | fumarate reductase (CoM/CoB) subunit A                                                                | -0.03 (-0.05 to -0.01) | 0.048 |

|        |                                                                                                               |                        |       |
|--------|---------------------------------------------------------------------------------------------------------------|------------------------|-------|
| K07458 | DNA mismatch endonuclease, patch repair protein                                                               | -0.03 (-0.05 to -0.01) | 0.048 |
| K00567 | methylated-DNA-[protein]-cysteine S-methyltransferase                                                         | -0.03 (-0.05 to -0.01) | 0.049 |
| K01011 | thiosulfate/3-mercaptopyruvate sulfurtransferase                                                              | -0.03 (-0.05 to -0.01) | 0.049 |
| K14392 | sodium/pantothenate symporter                                                                                 | -0.03 (-0.05 to -0.01) | 0.049 |
| K01153 | type I restriction enzyme, R subunit                                                                          | -0.03 (-0.05 to -0.01) | 0.049 |
| K01756 | adenylosuccinate lyase                                                                                        | -0.03 (-0.05 to -0.01) | 0.049 |
| K02982 | small subunit ribosomal protein S3                                                                            | -0.03 (-0.05 to -0.01) | 0.049 |
| K03166 | DNA topoisomerase VI subunit A                                                                                | -0.03 (-0.05 to -0.01) | 0.049 |
| K07096 | uncharacterized protein                                                                                       | -0.03 (-0.05 to -0.01) | 0.049 |
| K08298 | L-carnitine CoA-transferase                                                                                   | -0.03 (-0.05 to -0.01) | 0.049 |
| K09482 | glutamyl-tRNA(Gln) amidotransferase subunit D                                                                 | -0.03 (-0.05 to -0.01) | 0.049 |
| K10896 | fanconi anemia group M protein                                                                                | -0.03 (-0.05 to -0.01) | 0.049 |
| K11212 | LPPG:FO 2-phospho-L-lactate transferase<br>two-component system, OmpR family, sensor histidine<br>kinase CiaH | -0.03 (-0.05 to -0.01) | 0.049 |
| K14982 | carboxy-terminal domain RNA polymerase II polypeptide A<br>small phosphatase                                  | -0.03 (-0.05 to -0.01) | 0.049 |
| K15731 | HTH-type transcriptional regulator / antitoxin PezA                                                           | -0.03 (-0.05 to -0.01) | 0.049 |
| K18830 | nicotinate phosphoribosyltransferase                                                                          | -0.03 (-0.05 to -0.01) | 0.049 |
| K00763 | hydrogenase-4 component F                                                                                     | -0.03 (-0.05 to -0.01) | 0.049 |
| K12141 | potassium-transporting ATPase potassium-binding subunit                                                       | -0.03 (-0.05 to -0.01) | 0.049 |
| K01546 | large subunit ribosomal protein L6<br>tRNA (adenine57-N1/adenine58-N1)-methyltransferase<br>catalytic subunit | -0.03 (-0.05 to -0.01) | 0.049 |
| K07442 | large subunit ribosomal protein L29                                                                           | -0.03 (-0.05 to -0.01) | 0.049 |
| K02904 | uncharacterized protein                                                                                       | -0.03 (-0.05 to -0.01) | 0.049 |
| K06913 | RNA 2',3'-cyclic 3'-phosphodiesterase                                                                         | -0.03 (-0.05 to -0.01) | 0.049 |
| K01975 | small subunit ribosomal protein S8                                                                            | -0.03 (-0.05 to -0.01) | 0.049 |
| K02994 | pyrophosphatase PpaX                                                                                          | -0.03 (-0.05 to -0.01) | 0.050 |
| K06019 | Ca-activated chloride channel homolog                                                                         | -0.03 (-0.05 to -0.01) | 0.050 |

P values are adjusted for multiple testing using FDR correction.

**Figure S1. Associations between *Lactobacilli* and blood pressure by sex.**

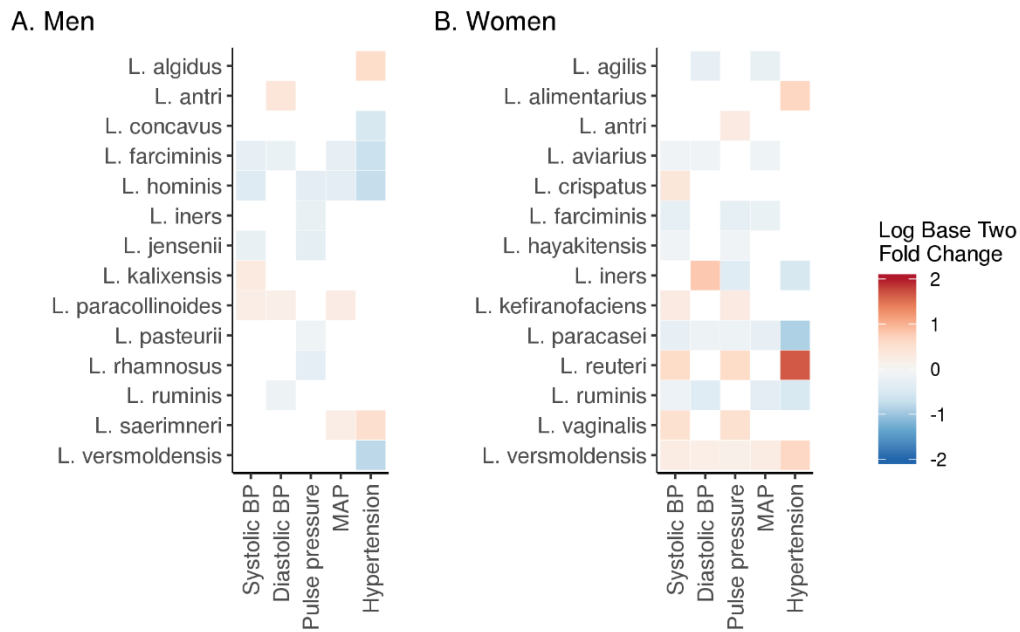

The models are adjusted for age, BMI, smoking, exercise, diuretics, beta blockers, calcium channel blockers, and renin–angiotensin system blockers. N=3 819 for women and N=3 134 for men. BP, Blood pressure; MAP, Mean arterial pressure.

**Figure S2. Associations between *Lactobacilli* and blood pressure by antihypertensive medication use.**

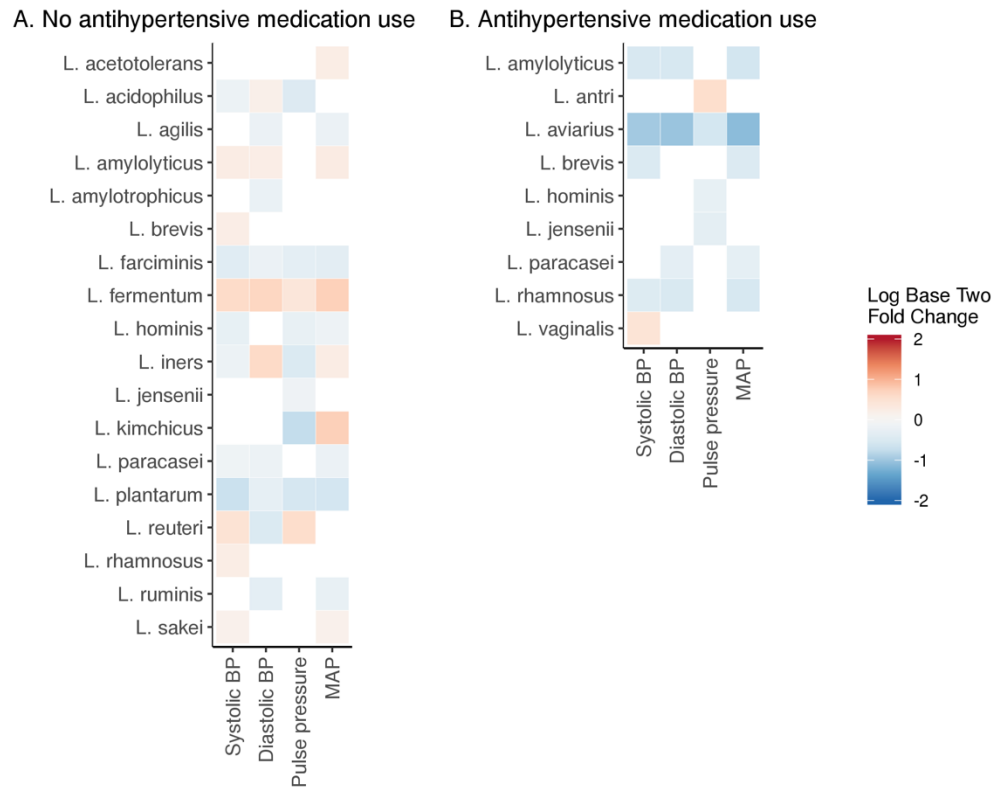

The models are adjusted for age, sex, BMI, smoking, exercise, diuretics, beta blockers, calcium channel blockers, and renin–angiotensin system blockers.

Association with bacterial plasmid is denoted using asterisk. N=1 253 for antihypertensive medication users and N=5 700 for non-users. BP, Blood pressure; MAP, Mean arterial pressure.

**Figure S3. Functional pathways associated with systolic BP.**

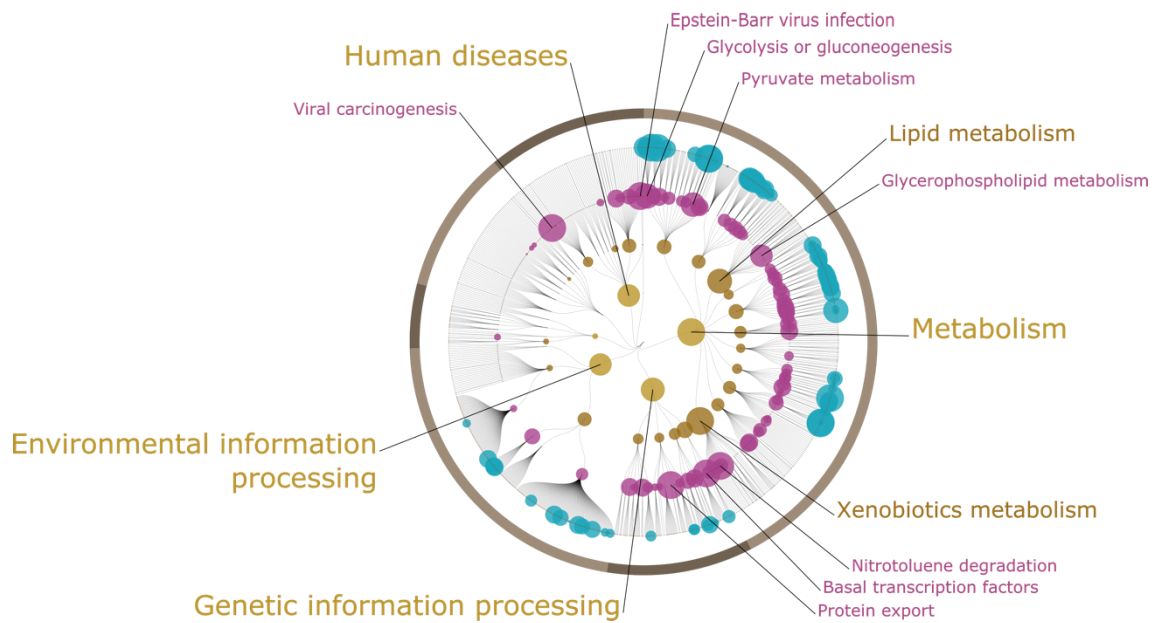

For the module (cyan), pathway (purple), biological process (dark brown), and biological category (light brown) functional layers, node size corresponds to the average inverse P value of the KO group assigned to that node. Only KO groups that were negatively associated with systolic BP were included. Node titles are shown for nodes in the three highest layers with a size > 200.
